# Supplementary material for: Identification and analysis of small molecule inhibitors of FosB from Staphylococcus aureus
Source: Royal Society of Chemistry journal article supplement (doi:10.1039/d3md00113j), 2023-01-01
Supplement: d3md00113j1.pdf [file d3md00113j1.pdf]

Supporting Information for:  
Identification and Analysis of Small Molecule Inhibitors of  
FosB from *Staphylococcus aureus*

Skye Travis<sup>1</sup>, Keith D. Green<sup>2</sup>, Nishad Thamban Chandrika<sup>2</sup>, Allan H. Pang<sup>2</sup>, Patrick A.

Frantom<sup>1</sup>, Oleg V. Tsodikov<sup>2</sup>, Sylvie Garneau-Tsodikova<sup>2</sup>, Matthew K. Thompson<sup>1\*</sup>

<sup>1</sup> Department of Chemistry & Biochemistry, The University of Alabama, 250 Hackberry Lane,  
Tuscaloosa, AL 35487

<sup>2</sup> Department of Pharmaceutical Sciences, College of Pharmacy, University of Kentucky, 789  
South Limestone St., Lexington, KY 40536

\*To whom correspondence should be addressed.

Matthew K. Thompson

Department of Chemistry & Biochemistry

The University of Alabama

Box 870336

Tuscaloosa AL 35487

Email: [mthompson10@ua.edu](mailto:mthompson10@ua.edu)

Phone: (205) 348-8439

**Table S1.** Data collection and structure refinement statistics of *B. cereus* FosB in complex with SO4, PPA, 2-PPP, HPP, H2Y, H2M.

| Inhibitor bound                                         | -                                             | PPA                                           | 2-PPP                                         | HPP                                           | H2Y                                           | H2M                                           |
|---------------------------------------------------------|-----------------------------------------------|-----------------------------------------------|-----------------------------------------------|-----------------------------------------------|-----------------------------------------------|-----------------------------------------------|
| PDB entry                                               | 8G71                                          | 8E7R                                          | 8E7Q                                          | 8G7F                                          | 8G7H                                          | 8G7G                                          |
| <b>Data collection</b>                                  |                                               |                                               |                                               |                                               |                                               |                                               |
| Space group                                             | P2 <sub>1</sub> 2 <sub>1</sub> 2 <sub>1</sub> |
| Unit cell dimensions                                    |                                               |                                               |                                               |                                               |                                               |                                               |
| <i>a</i> , <i>b</i> , <i>c</i> (Å)                      | 63.5, 68.4, 70.1                              | 64.7, 67.8, 69.7                              | 64.3, 68.0, 69.8                              | 64.2, 68.3, 69.9                              | 64.2, 68.2, 69.8                              | 64.2, 68.5, 69.5                              |
| $\alpha$ , $\beta$ , $\gamma$ (°)                       | 90, 90, 90                                    | 90, 90, 90                                    | 90, 90, 90                                    | 90, 90, 90                                    | 90, 90, 90                                    | 90, 90, 90                                    |
| Resolution (Å)                                          | 50.00 – 1.83<br>(1.86 – 1.83)                 | 50.00 – 1.98<br>(2.01 – 1.98)                 | 50.00 – 1.9<br>(1.93 – 1.9)                   | 50.00 – 2.04<br>(2.08 – 2.04)                 | 50.00 – 1.81<br>(1.84 – 1.81)                 | 50.00 – 2.23<br>(2.27 – 2.23)                 |
| <i>R</i> <sub>sym</sub>                                 | 0.140 (0.782)                                 | 0.16 (0.583)                                  | 0.141 (0.570)                                 | 0.164 (0.746)                                 | 0.138 (0.785)                                 | 0.144 (0.552)                                 |
| No. of unique reflections                               | 27944 (1388)                                  | 22012 (1054)                                  | 24190 (1182)                                  | 20157 (1012)                                  | 28683 (1409)                                  | 15452 (738)                                   |
| <i>I</i> / $\sigma$ <i>I</i>                            | 16.8 (2.2)                                    | 9.4 (1.9)                                     | 10.2 (2.0)                                    | 9.1 (1.8)                                     | 17.0 (2.1)                                    | 10.38 (2.1)                                   |
| CC <sub>1/2</sub>                                       | 0.99 (0.87)                                   | 0.98 (0.75)                                   | 0.98 (0.78)                                   | 0.99 (0.79)                                   | 0.99 (0.84)                                   | 0.99 (0.85)                                   |
| Completeness (%)                                        | 99.7 (99.9)                                   | 99.8 (99.8)                                   | 97.6 (98.3)                                   | 99.9 (100)                                    | 99 (100)                                      | 99.7 (98.5)                                   |
| Average redundancy                                      | 10.6 (10.4)                                   | 5.2 (5.0)                                     | 5.0 (5.1)                                     | 7.3 (7.4)                                     | 10.7 (9.5)                                    | 7.8 (6.6)                                     |
| <b>Structure refinement</b>                             |                                               |                                               |                                               |                                               |                                               |                                               |
| Resolution (Å)                                          | 48.94 – 1.82                                  | 46.81 – 1.97                                  | 38.83 – 1.90                                  | 47.27 – 2.00                                  | 48.80 – 1.81                                  | 47.20 – 2.23                                  |
| <i>R</i> <sub>work</sub> / <i>R</i> <sub>free</sub> (%) | 15.9 / 18.8                                   | 16.9 / 22.0                                   | 16.9 / 21.9                                   | 16.1 / 21.5                                   | 16.0 / 19.0                                   | 17.9 / 24.5                                   |
| r.m.s. deviations                                       |                                               |                                               |                                               |                                               |                                               |                                               |
| Bond lengths (Å)                                        | 0.013                                         | 0.007                                         | 0.008                                         | 0.009                                         | 0.010                                         | 0.008                                         |
| Bond angles (°)                                         | 1.536                                         | 1.444                                         | 1.489                                         | 1.483                                         | 1.686                                         | 1.456                                         |
| Ramachandran plot statistics: <sup>a</sup>              |                                               |                                               |                                               |                                               |                                               |                                               |
| % of residues in favored region                         | 98.2                                          | 97.8                                          | 98.5                                          | 97.4                                          | 99.3                                          | 97.4                                          |
| % of residues in allowed region                         | 1.8                                           | 2.2                                           | 1.5                                           | 2.6                                           | 0.7                                           | 2.6                                           |
| % outliers                                              | 0                                             | 0                                             | 0                                             | 0                                             | 0                                             | 0                                             |
| Additional ligands in the structure (PDB chemical ID)   |                                               |                                               |                                               |                                               |                                               |                                               |
|                                                         | Sulfate ion (SO4)                             | Zinc ion (Zn)                                 |
|                                                         | Zinc ion (Zn)                                 | Magnesium ion (Mg)                            |
|                                                         | Magnesium ion (Mg)                            | Formic acid (FMT)                             |
|                                                         | Formic acid (FMT)                             |                                               |                                               | Glycerol (GOL)                                | Glycerol (GOL)                                |                                               |

Values in the parentheses were calculated from data for the highest resolution shell. <sup>a</sup>The stereochemistry of the refined structures was assessed using MolProbity<sup>1</sup>

**Table S2.** Molecular interactions of ligands in the FosB<sup>Bc</sup> active site.

| Compound                     | Molecular Interactions | Distance (Å) |
|------------------------------|------------------------|--------------|
| Fosfomycin<br>(PDB ID: 4JH3) | Tyr64:OH—Lig:O3        | 2.6          |
|                              | Arg94:NE—Lig:O3        | 2.8          |
|                              | Arg94:NH2—Lig:O1       | 2.9          |
|                              | Tyr105:OH—Lig:O2       | 2.6          |
|                              | Arg124:NH1—Lig:O1      | 2.9          |
|                              | Zn—Lig:O2              | 2.0          |
|                              | Zn—Lig:O               | 2.5          |

|                |                   |     |
|----------------|-------------------|-----|
|                | Asn50:NH—Lig:O4   | 3.4 |
|                | Tyr64:OH—Lig:O3   | 2.4 |
|                | Arg94:NE—Lig:O3   | 2.8 |
| PPF            | Arg94:NH2—Lig:O1  | 2.8 |
| (PDB ID: 8DTD) | Tyr105:OH—Lig:O2  | 2.5 |
|                | Arg124:NH1—Lig:O1 | 3.0 |
|                | Zn—Lig:O2         | 2.1 |
|                | Zn—Lig:O5         | 2.2 |
|                | Asn50:NH—Lig:O1   | 2.8 |
|                | Tyr64:OH—Lig:O3   | 2.7 |
|                | Arg94:NE—Lig:O3   | 2.9 |
| <b>1</b>       | Arg94:NH2—Lig:O2  | 3.0 |
| (PDB ID: 8G7F) | Tyr105:OH—Lig:O4  | 2.7 |
|                | Arg124:NH1—Lig:O2 | 2.8 |
|                | Zn—Lig:O4         | 1.9 |
|                | Tyr39:OH—Lig:O1   | 2.7 |
|                | Tyr64:OH—Lig:O2   | 2.6 |
|                | Arg94:NE—Lig:O2   | 2.9 |
| <b>2</b>       | Arg94:NH2—Lig:O4  | 2.8 |
| (PDB ID: 8G7H) | Tyr105:OH—Lig:O3  | 2.8 |
|                | Arg124:NH1—Lig:O4 | 2.9 |
|                | Zn—Lig:O3         | 1.9 |
|                | Tyr64:OH—Lig:O4   | 2.6 |
|                | Arg94:NE—Lig:O4   | 3.0 |
|                | Arg94:NH2—Lig:O3  | 2.8 |
| <b>3</b>       | Tyr105:OH—Lig:O2  | 2.5 |
| (PDB ID: 8G7G) | Arg124:NH1—Lig:O3 | 3.0 |
|                | Zn—Lig:O2         | 2.0 |
|                | Zn—Lig:O1         | 2.4 |

|                     |                   |     |
|---------------------|-------------------|-----|
| 4<br>(PDB ID: 8E7R) | Asn50:NH—Lig:O2   | 2.6 |
|                     | Tyr64:OH—Lig:O3   | 2.6 |
|                     | Arg94:NE—Lig:O3   | 3.0 |
|                     | Arg94:NH2—Lig:O5  | 2.8 |
|                     | Tyr105:OH—Lig:O4  | 2.8 |
|                     | Arg124:NH1—Lig:O5 | 2.9 |
|                     | Zn—Lig:O4         | 1.9 |
| Zn—Lig:O1           | 3.4               |     |
| 5<br>(PDB ID: 8E7Q) | Asn50:NH—Lig:O2   | 3.1 |
|                     | Tyr64:OH—Lig:O4   | 2.6 |
|                     | Arg94:NE—Lig:O4   | 3.1 |
|                     | Arg94:NH2—Lig:O3  | 2.9 |
|                     | Tyr105:OH—Lig:O5  | 2.6 |
|                     | Arg124:NH1—Lig:O3 | 2.8 |
|                     | Zn—Lig:O5         | 2.0 |
| Zn—Lig:O1           | 4.4               |     |

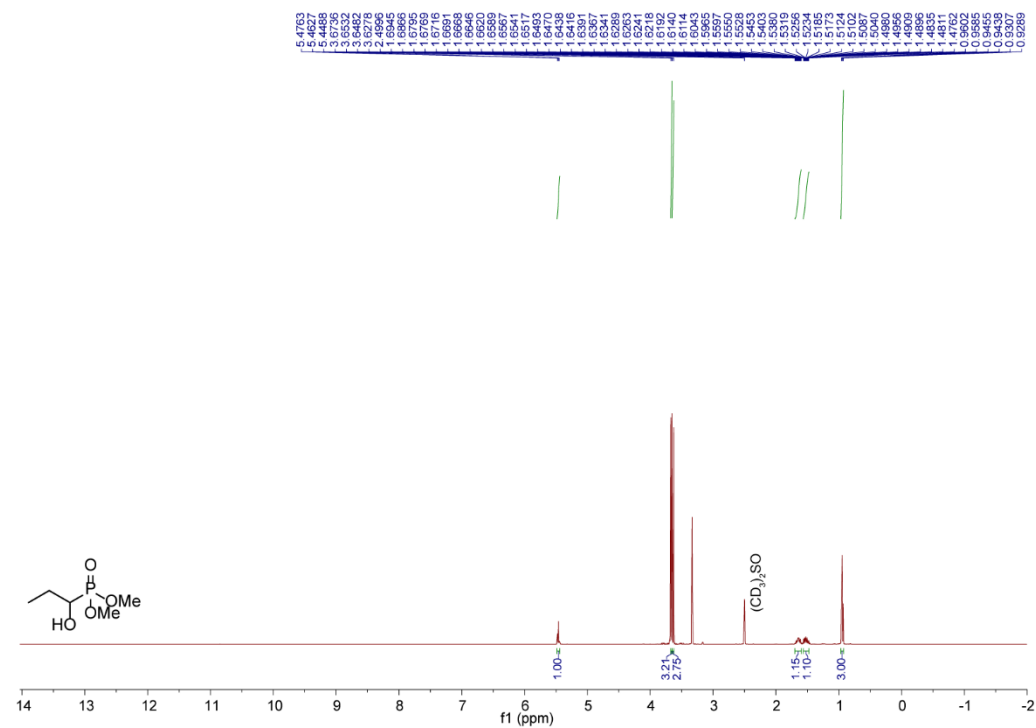

**Figure S1.**  $^1\text{H}$  NMR spectrum for compound **9** in  $(\text{CD}_3)_2\text{SO}$  (500 MHz).

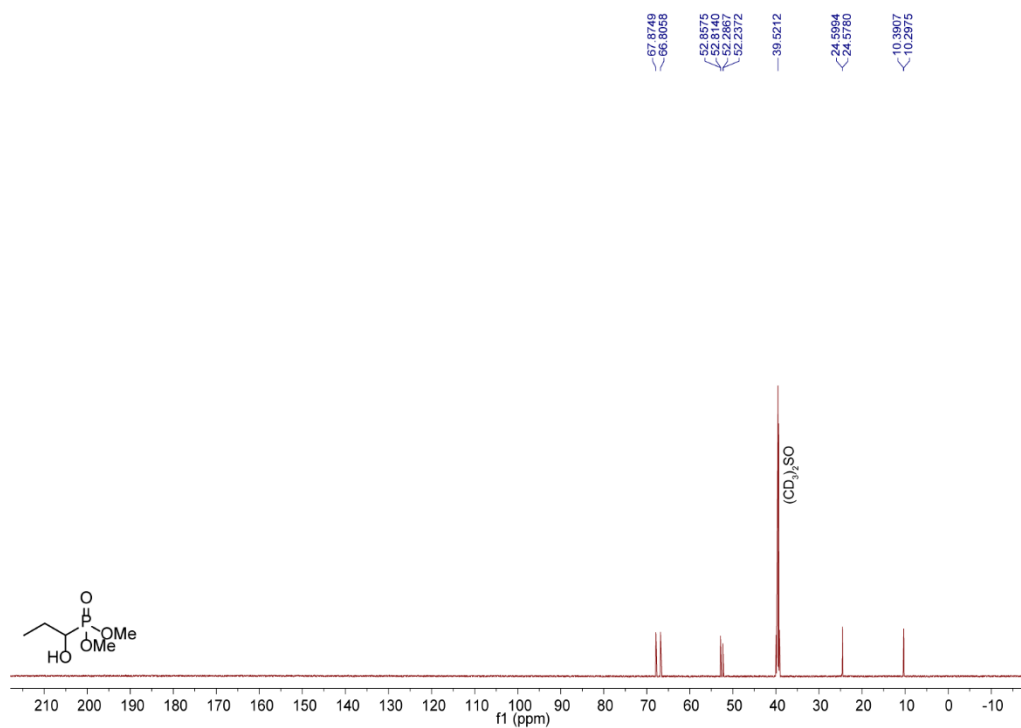

**Figure S2.**  $^{13}\text{C}$  NMR spectrum for compound **9** in  $(\text{CD}_3)_2\text{SO}$  (150 MHz).

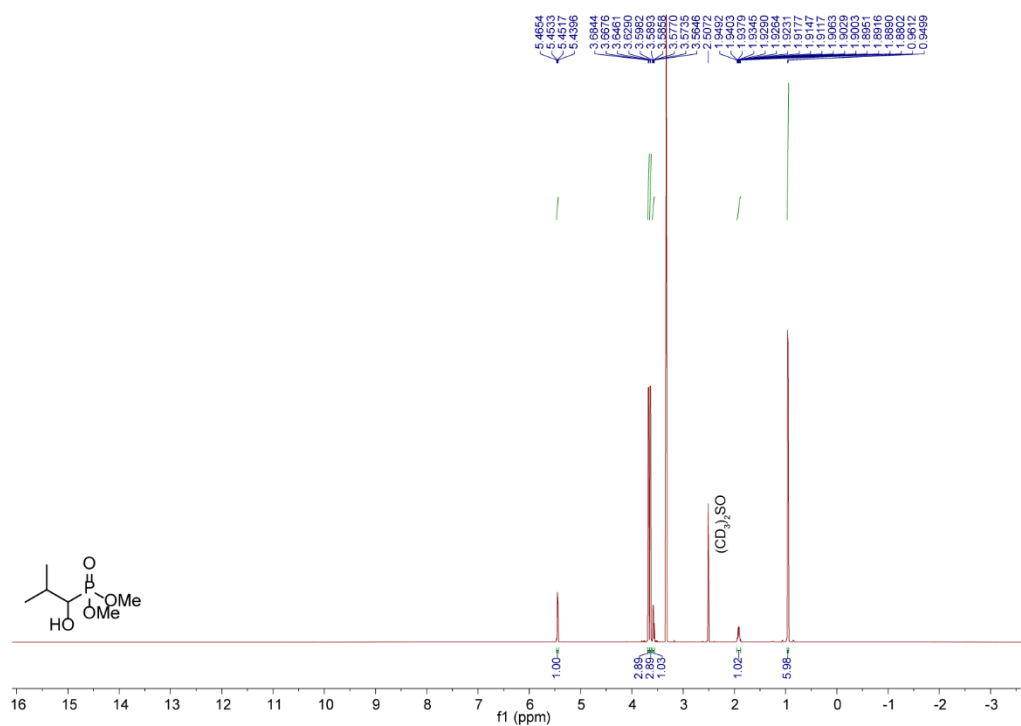

**Figure S3.**  $^1\text{H}$  NMR spectrum for compound **10** in  $(\text{CD}_3)_2\text{SO}$  (600 MHz).

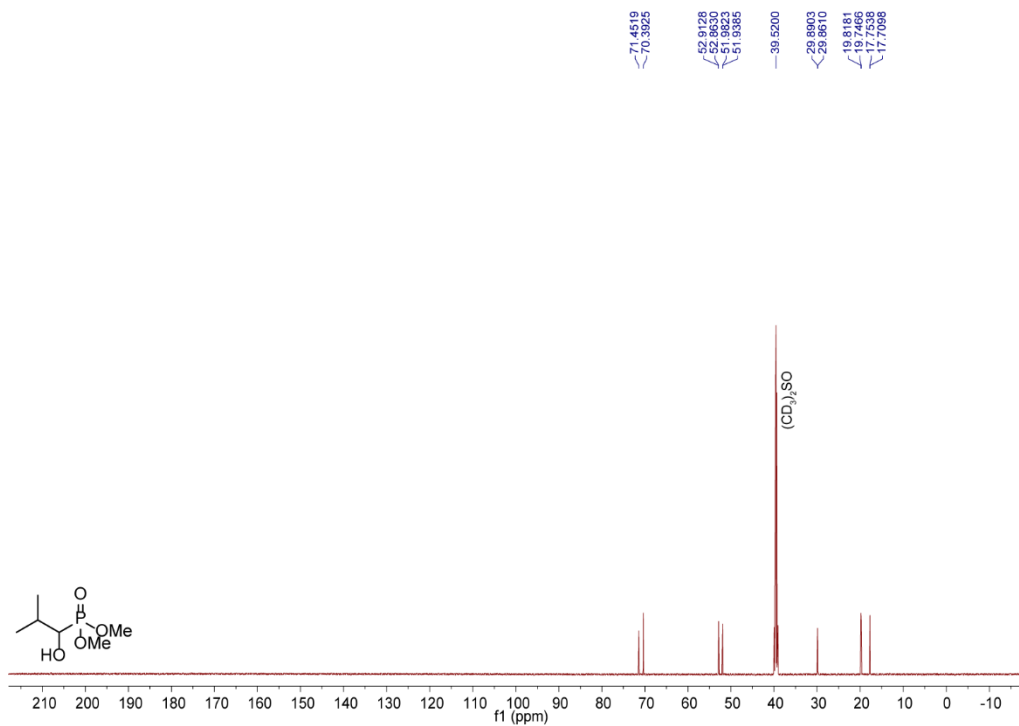

**Figure S4.**  $^{13}\text{C}$  NMR spectrum for compound **10** in  $(\text{CD}_3)_2\text{SO}$  (150 MHz).

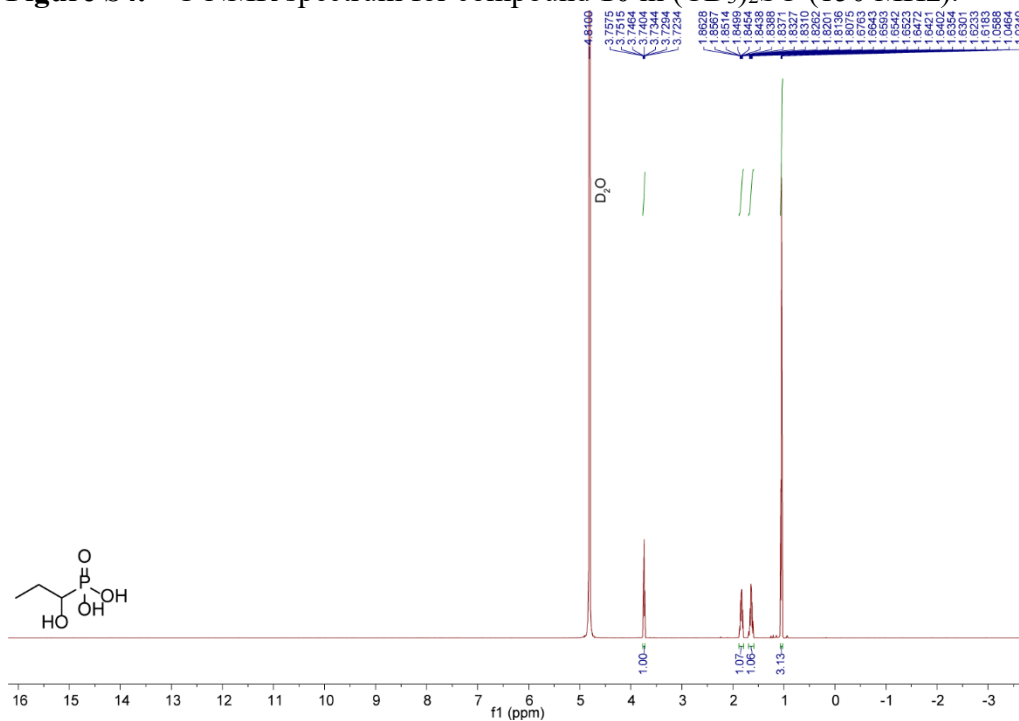

**Figure S5.**  $^1\text{H}$  NMR spectrum for compound **1** (1H2M) in  $\text{D}_2\text{O}$  (600 MHz).

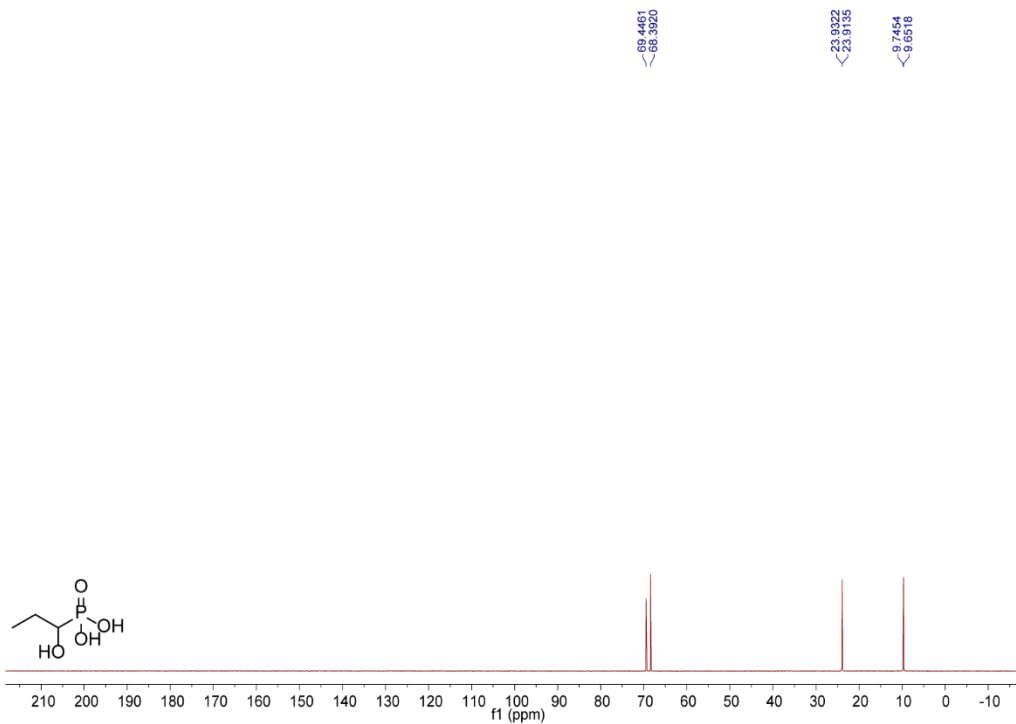

**Figure S6.** <sup>13</sup>C NMR spectrum for compound **1** (1H2M) in D<sub>2</sub>O (150 MHz).

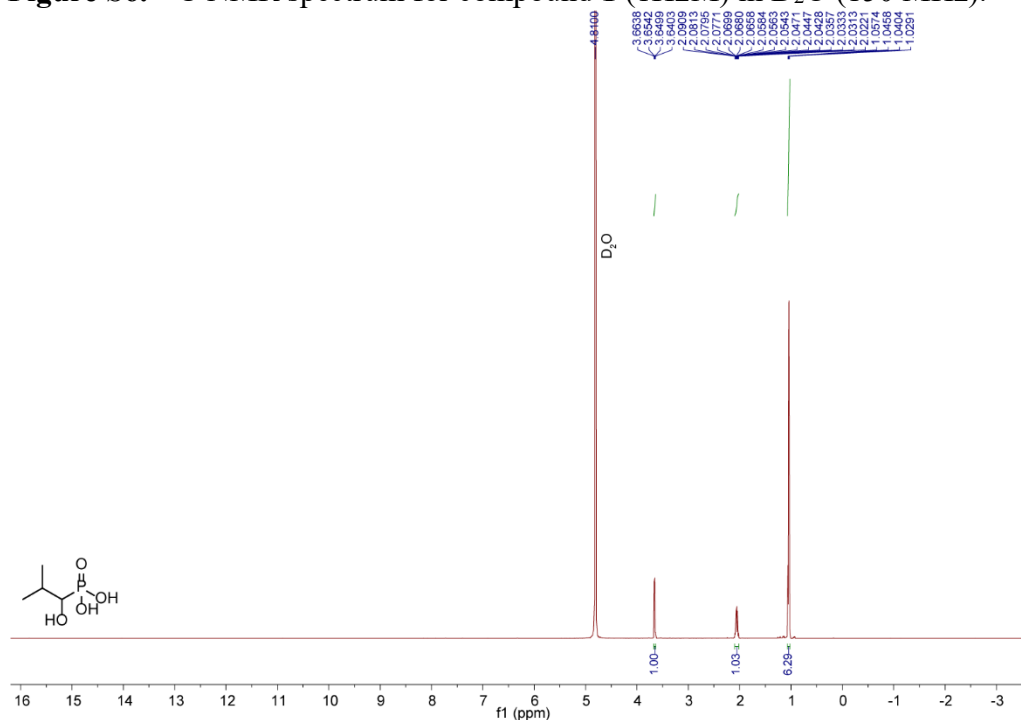

**Figure S7.** <sup>1</sup>H NMR spectrum for compound **3** (1HPP) in D<sub>2</sub>O (600 MHz).

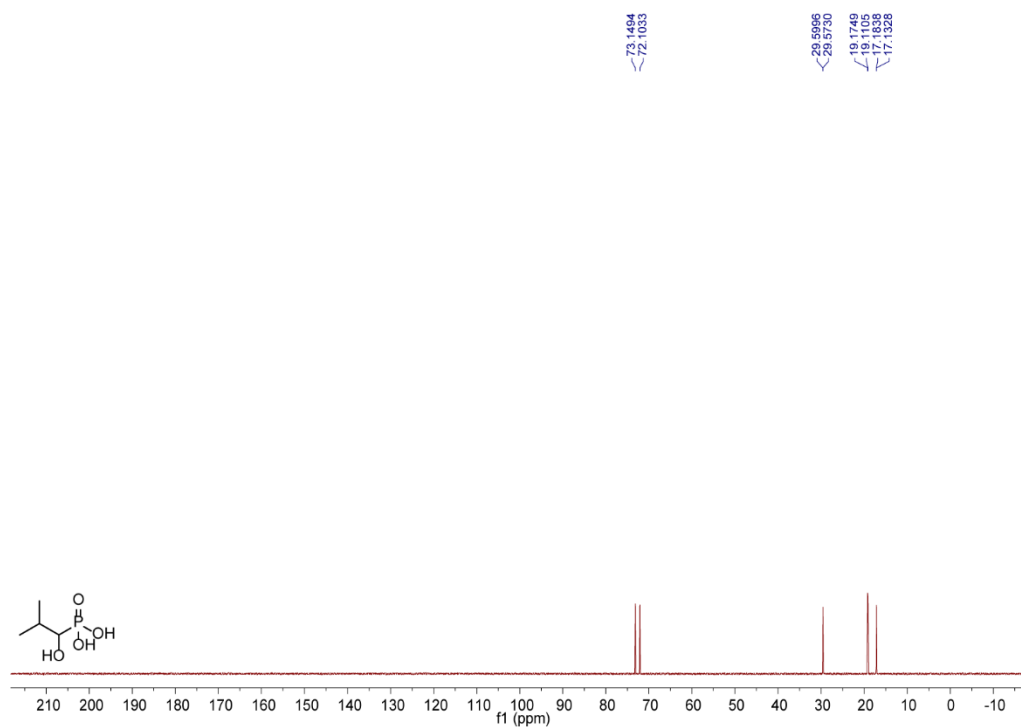

**Figure S8.**  $^{13}\text{C}$  NMR spectrum for compound **3** (1HPP) in  $\text{D}_2\text{O}$  (150 MHz).

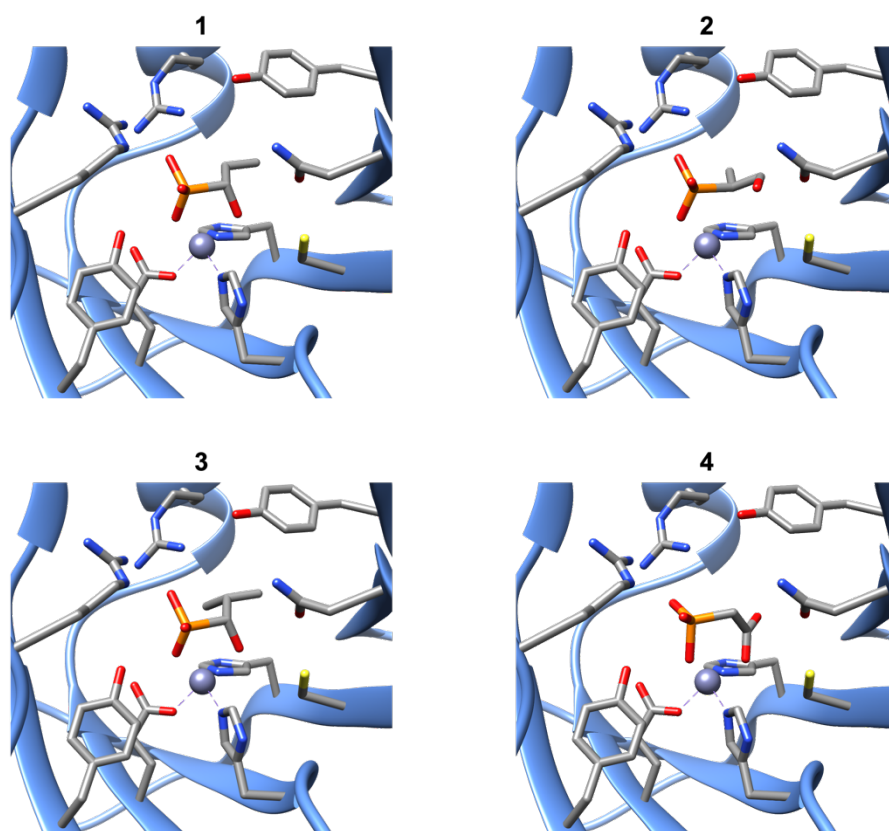



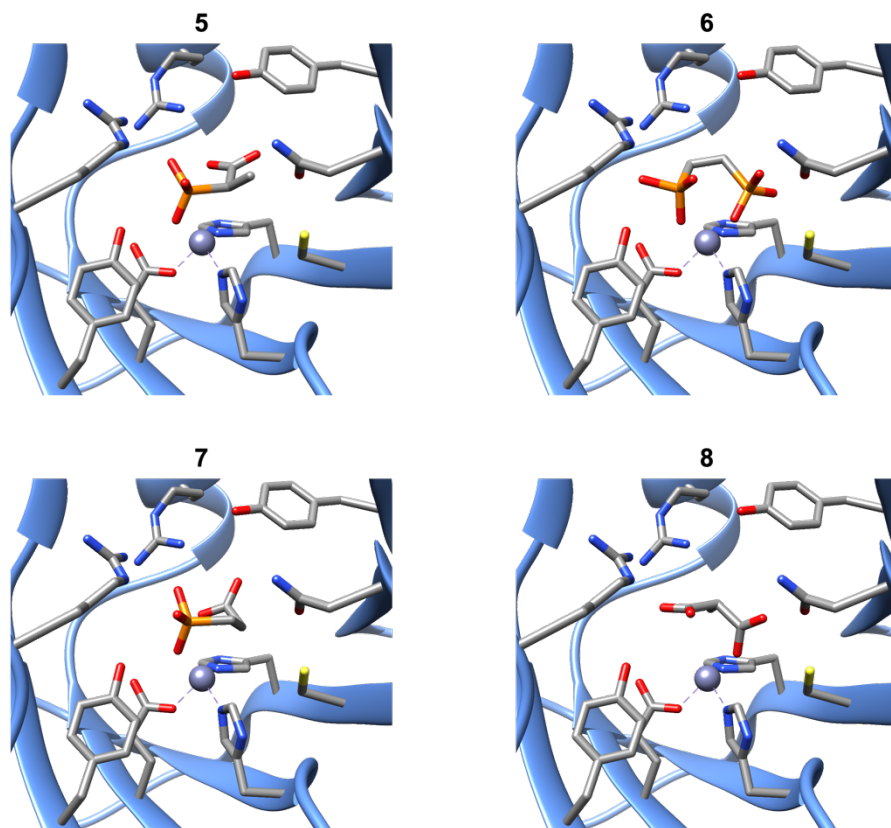

**Figure S9.** Glide docking output for each of the compounds in our working library. Each image represents the docking pose corresponding to the Glide score given in Table 1 in the main text.

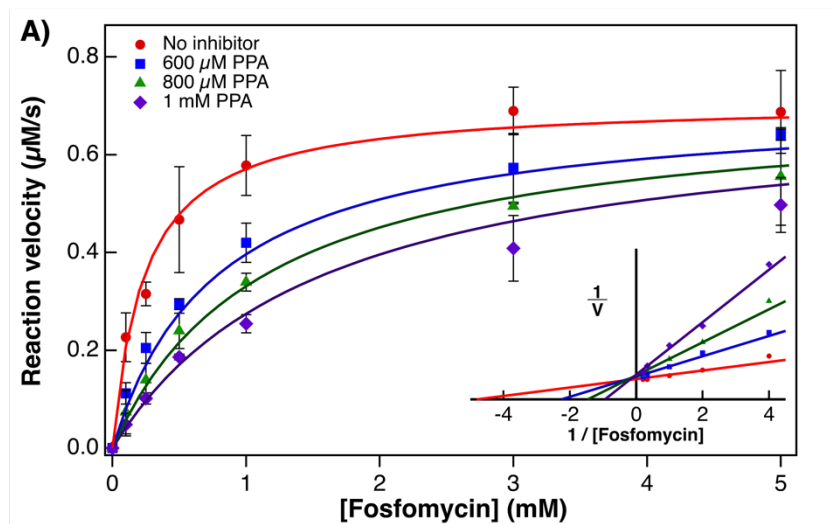

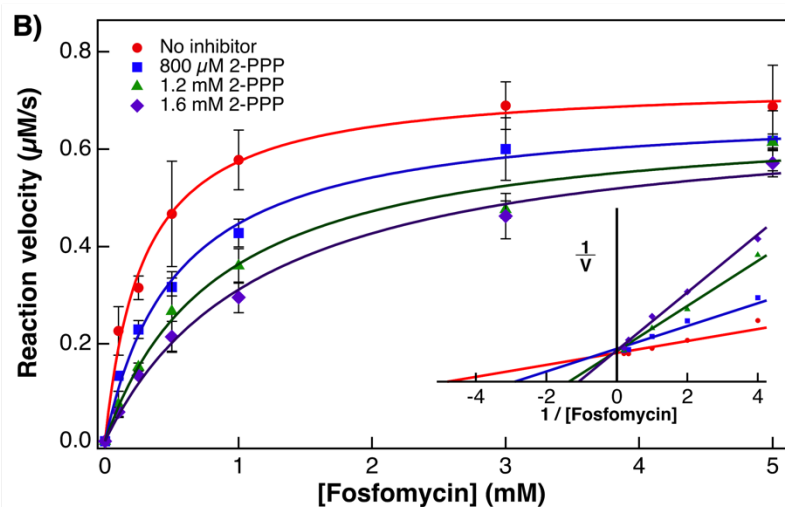

**Figure S10.** Michaelis-Menten kinetics of FosB<sup>S<sub>a</sub></sup> inhibition. **A** shows inhibition by 600 μM, 800 μM, or 1 mM PPA. **B** shows inhibition by 800 μM, 1.2 mM, or 1.6 mM 2-PPP. Inset graphs show the Lineweaver-Burk plots of each.

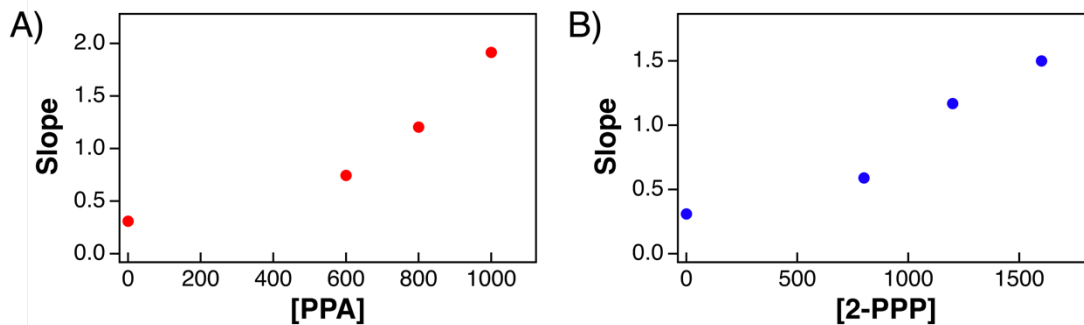

**Figure S11.** Replots of the slopes from the Lineweaver-Burk plots shown in Figure S10 with respect to inhibitor concentration. **A** shows the data for PPA. **B** shows the data for 2-PPP.

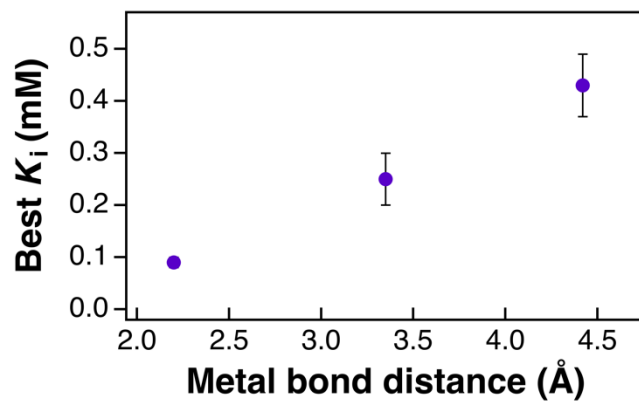

**Figure S12.** Plot of the best  $K_i$  values of PPF, compound **4**, and compound **5** compared to their carboxylate oxygen-metal distance.

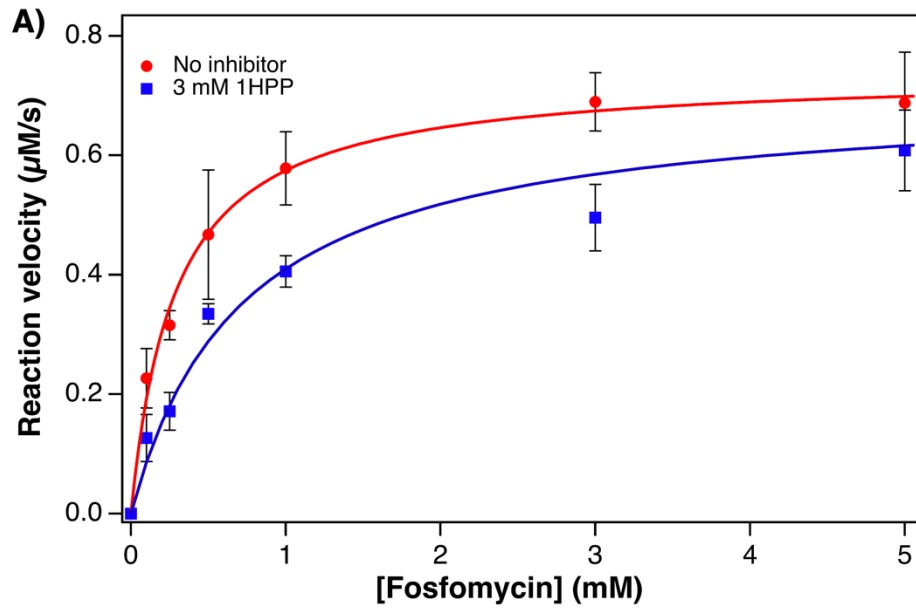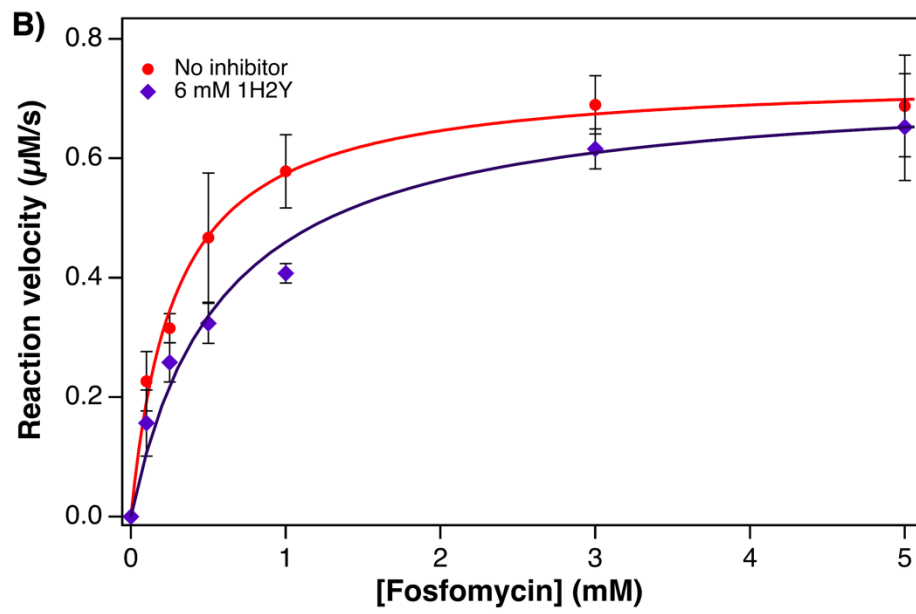

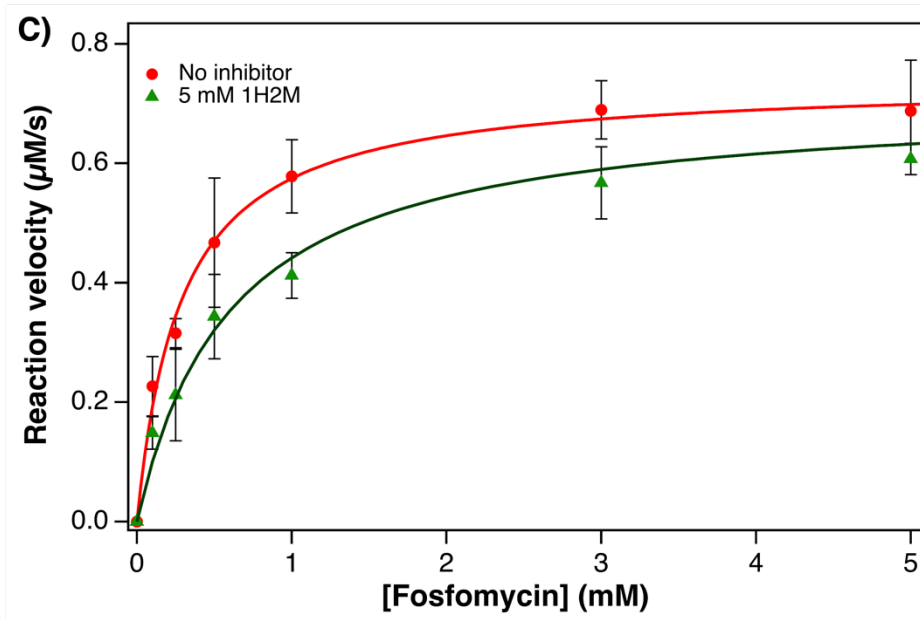

**Figure S13.** Michaelis-Menten kinetics of FosB<sup>Sa</sup> inhibition with **A)** 3 mM 1HPP (compound **1**), **B)** 6 mM 1H2Y (compound **2**), or **C)** 5 mM 1H2M (compound **3**).

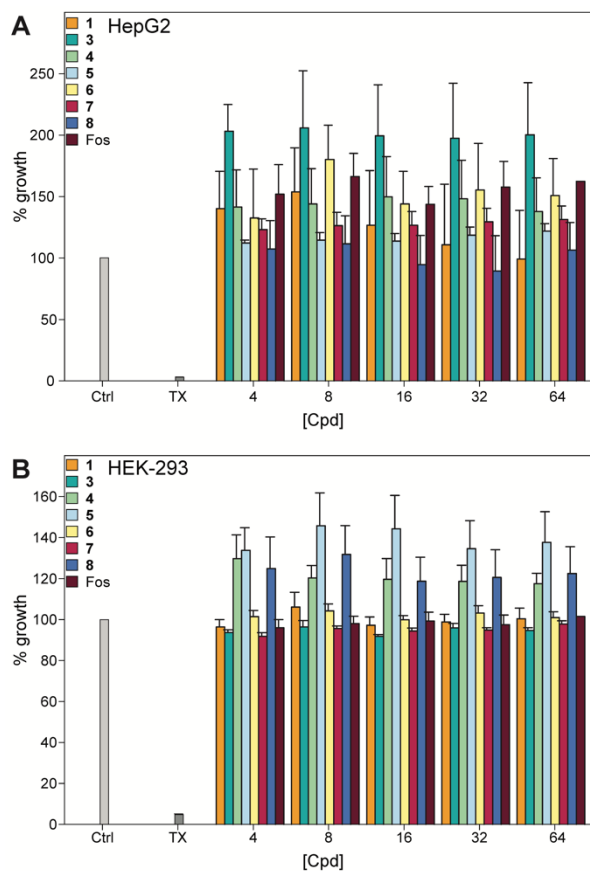

**Figure S14.** Mammalian cell cytotoxicity of compounds **1**, **3-8**, and fosfomycin at varying concentrations against HepG2 (top panel) and HEK-293 (bottom panel) cell lines. *Note:* The corresponding normalized plots can be found in the main text (Figure 5).

## References

1. C. J. Williams, J. J. Headd, N. W. Moriarty, M. G. Prisant, L. L. Videau, L. N. Deis, V. Verma, D. A. Keedy, B. J. Hintze, V. B. Chen, S. Jain, S. M. Lewis, W. B. Arendall, 3rd, J. Snoeyink, P. D. Adams, S. C. Lovell, J. S. Richardson and D. C. Richardson, *Protein Sci*, 2018, **27**, 293-315.
